# Supplementary material for: Interpretation of the Meaningfulness of Symptom Reduction with Vibegron in Patients with Overactive Bladder: Analyses from EMPOWUR
Source: Springer Nature journal article supplement (doi:10.1007/s12325-021-01972-8), 2021-12-18
Supplement: MOESM1 [file 19967458]

## **SUPPLEMENTARY MATERIAL**

### **Interpretation of the Meaningfulness of Symptom Reduction with Vibegron in Patients with Overactive Bladder: Analyses from EMPOWUR**

**Authors:** Jeffrey Frankel, MD,<sup>1</sup> David Staskin, MD,<sup>2</sup> Susann Varano, MD,<sup>3</sup> Michael Kennelly, MD,<sup>4</sup> Diane K. Newman, DNP, ANP-BC,<sup>5</sup> Matt T. Rosenberg, MD,<sup>6</sup> Rachael A. Jankowich, RN, MSN,<sup>7\*</sup> Denise Shortino, MS,<sup>7\*</sup> Paul N. Mudd Jr, PharmD, MBA,<sup>7\*</sup> Cynthia J. Girman, DrPH, FISPE<sup>8</sup>

<sup>1</sup>Seattle Urology Research Center, Seattle, WA, USA; <sup>2</sup>Tufts University School of Medicine, Boston, MA, USA; <sup>3</sup>Clinical Research Consulting, Milford, CT, USA; <sup>4</sup>Carolinas Medical Center, Charlotte, NC, USA; <sup>5</sup>Perelman School of Medicine, University of Pennsylvania, Philadelphia, PA, USA; <sup>6</sup>Mid-Michigan Health Centers, Jackson, MI, USA; <sup>7</sup>Urovant Sciences, Irvine, CA, USA; <sup>8</sup>CERobs Consulting, LLC, Chapel Hill, NC, USA

\*At the time the study was conducted.

**Corresponding Author:** Cynthia J. Girman, DrPH, FISPE

CERobs Consulting, LLC

2612 Lumina Avenue North

Wrightsville Beach, NC 28480

[cindy.girman@cerobs.com](mailto:cindy.girman@cerobs.com)

1-910-679-8023

**Supplementary Table 1. Change From Baseline at Week 12 in Average Daily Number of Micturitions, Urgency Episodes, and UUI Episodes by PGI-Change\* (Pooled Across Treatment Groups)**

|                                 | N   | Mean Change (SD) | Mean % Change (SD) | Median Change | Median % Change |
|---------------------------------|-----|------------------|--------------------|---------------|-----------------|
| <b>Micturitions</b>             |     |                  |                    |               |                 |
| Much better                     | 430 | -2.49 (2.32)     | -21.51 (18.48)     | -2.29         | -21.86          |
| Moderately better               | 303 | -1.95 (2.76)     | -15.65 (23.16)     | -2.00         | -18.18          |
| A little better                 | 337 | -1.68 (2.58)     | 0.23 (241.30)      | -1.50         | -12.95          |
| No change or worse              | 263 | -0.70 (2.74)     | -4.71 (19.31)      | -0.57         | -4.96           |
| <b>Urgency episodes</b>         |     |                  |                    |               |                 |
| Much better                     | 430 | -3.74 (3.38)     | -52.62 (41.30)     | -3.15         | -60.89          |
| Moderately better               | 303 | -2.76 (3.76)     | -27.64 (123.32)    | -2.29         | -35.00          |
| A little better                 | 337 | -2.19 (3.44)     | -15.45 (112.47)    | -1.68         | -24.14          |
| No change or worse              | 263 | -0.95 (3.49)     | -8.15 (44.50)      | -0.57         | -8.83           |
| <b>UUI episodes<sup>†</sup></b> |     |                  |                    |               |                 |
| Much better                     | 341 | -2.54 (2.24)     | -77.87 (60.57)     | -2.00         | -93.17          |
| Moderately better               | 227 | -1.71 (2.46)     | -45.83 (65.67)     | -1.33         | -64.49          |
| A little better                 | 272 | -1.47 (2.16)     | -33.55 (74.73)     | -1.00         | -44.12          |
| No change or worse              | 191 | -0.69 (2.35)     | 6.40 (159.99)      | -0.61         | -22.31          |

FAS, full analysis set; FAS-I, FAS for incontinence; PGI-C, Patient Global Impression of Change; UUI, urge urinary incontinence.

\*Presented in the FAS (all randomized patients who took  $\geq 1$  dose of double-blind study treatment and had  $\geq 1$  evaluable change from baseline micturition measurement).

<sup>†</sup>Presented in the FAS-I (all randomized patients who took  $\geq 1$  dose of double-blind study treatment and had  $\geq 1$  evaluable change from baseline measurement for UUI episodes).
